# Supplementary material for: Inhibition of overactive TGF-β attenuates progression of heterotopic ossification in mice
Source: PubMed Central journal article supplement (PMC5803194; doi:10.1038/s41467-018-02988-5), 2018-02-07
Supplement: 41467_2018_2988_MOESM1_ESM.pdf [file 41467_2018_2988_MOESM1_ESM.pdf]

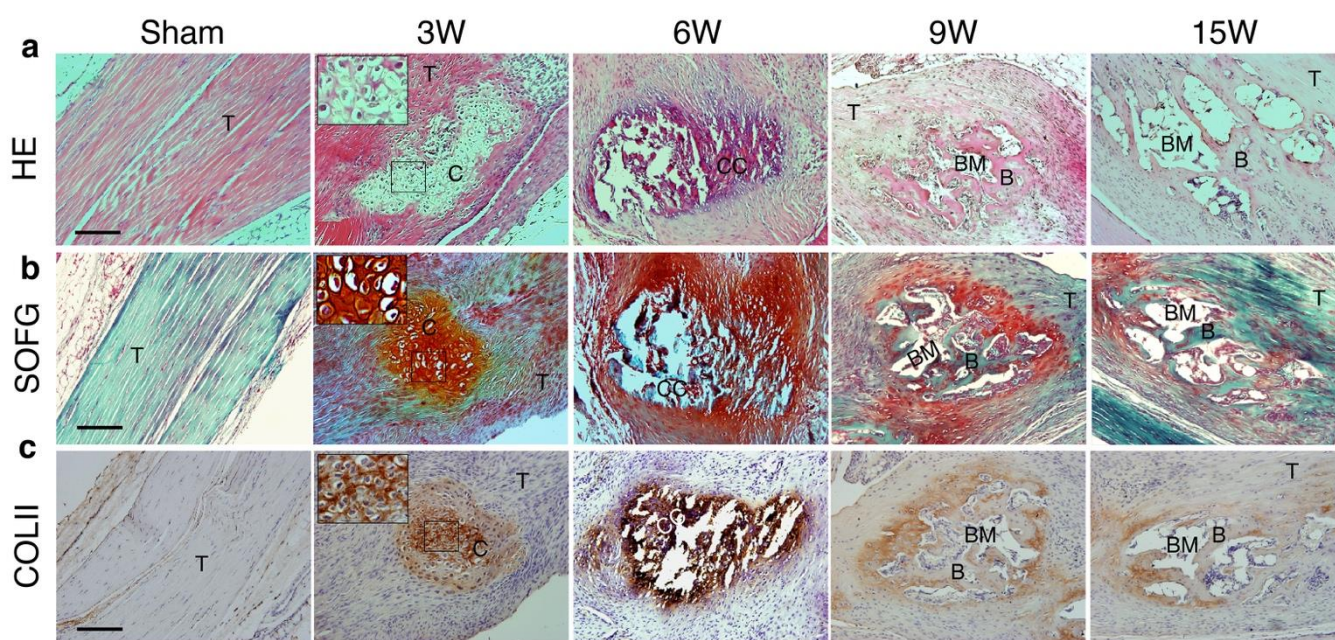

**Supplementary Figure 1. Analysis of HO in Achilles tendon in ATP mice.**

(a) H&E, (b) SOFG staining and (c) COLII immunostaining of Achilles tendon. Scale bars, 100 $\mu$ m. Magnified view of the boxed region of Achilles tendons 3 weeks after ATP were shown on the top left in the same figure.

T, tendon; C, cartilage; CC, calcified cartilage; B, bone; BM, bone marrow.

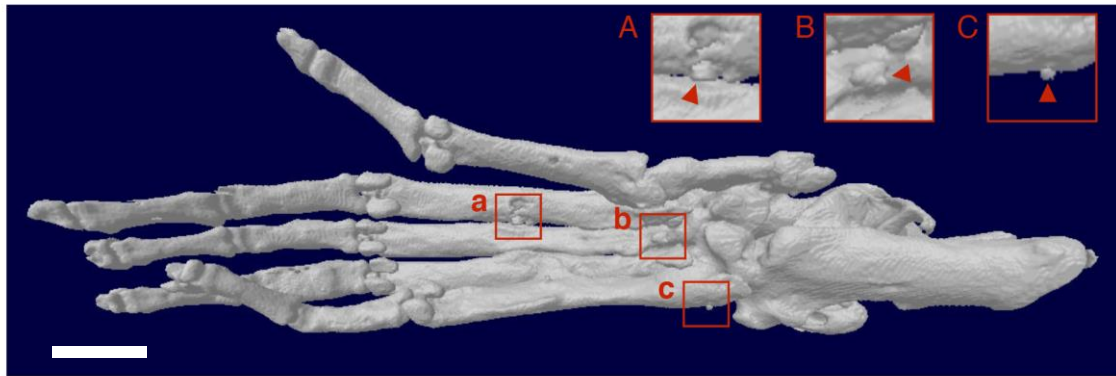

**Supplementary Figure 2. Spontaneous HO in the ligaments of paws in 4-month-old CED mice.**

(a-c) Ossified lesions were detected in ligaments of paws in 4-month-old CED mice. A-C are magnified view of the boxed region of HO lesions. Scar bar, 2mm.

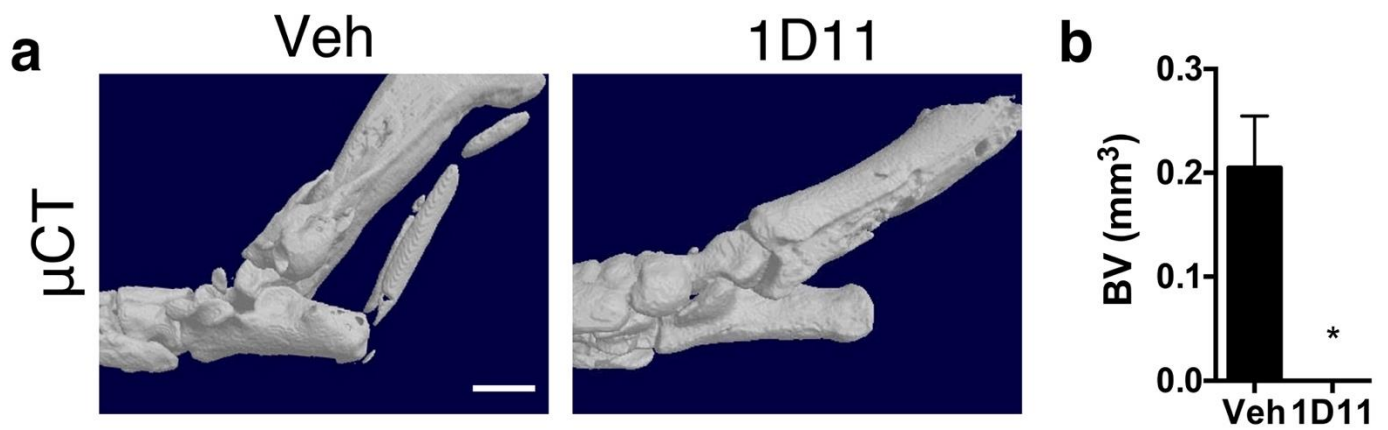

**Supplementary Figure 3. Administration of TGF- $\beta$  neutralizing antibody mitigates spontaneous HO in CED mice.**

(a) Micro CT images of the Achilles tendon (sagittal view) of CED mice treated with vehicle or 1D11 daily for 4 weeks. (b) Quantitative analysis of bone volume of HO in Achilles tendon. Scale bar, 2mm. All data are shown as the mean  $\pm$  s.d. n = 8 per group. \* $p < 0.05$  determined by two tailed, unpaired student's *t* test.

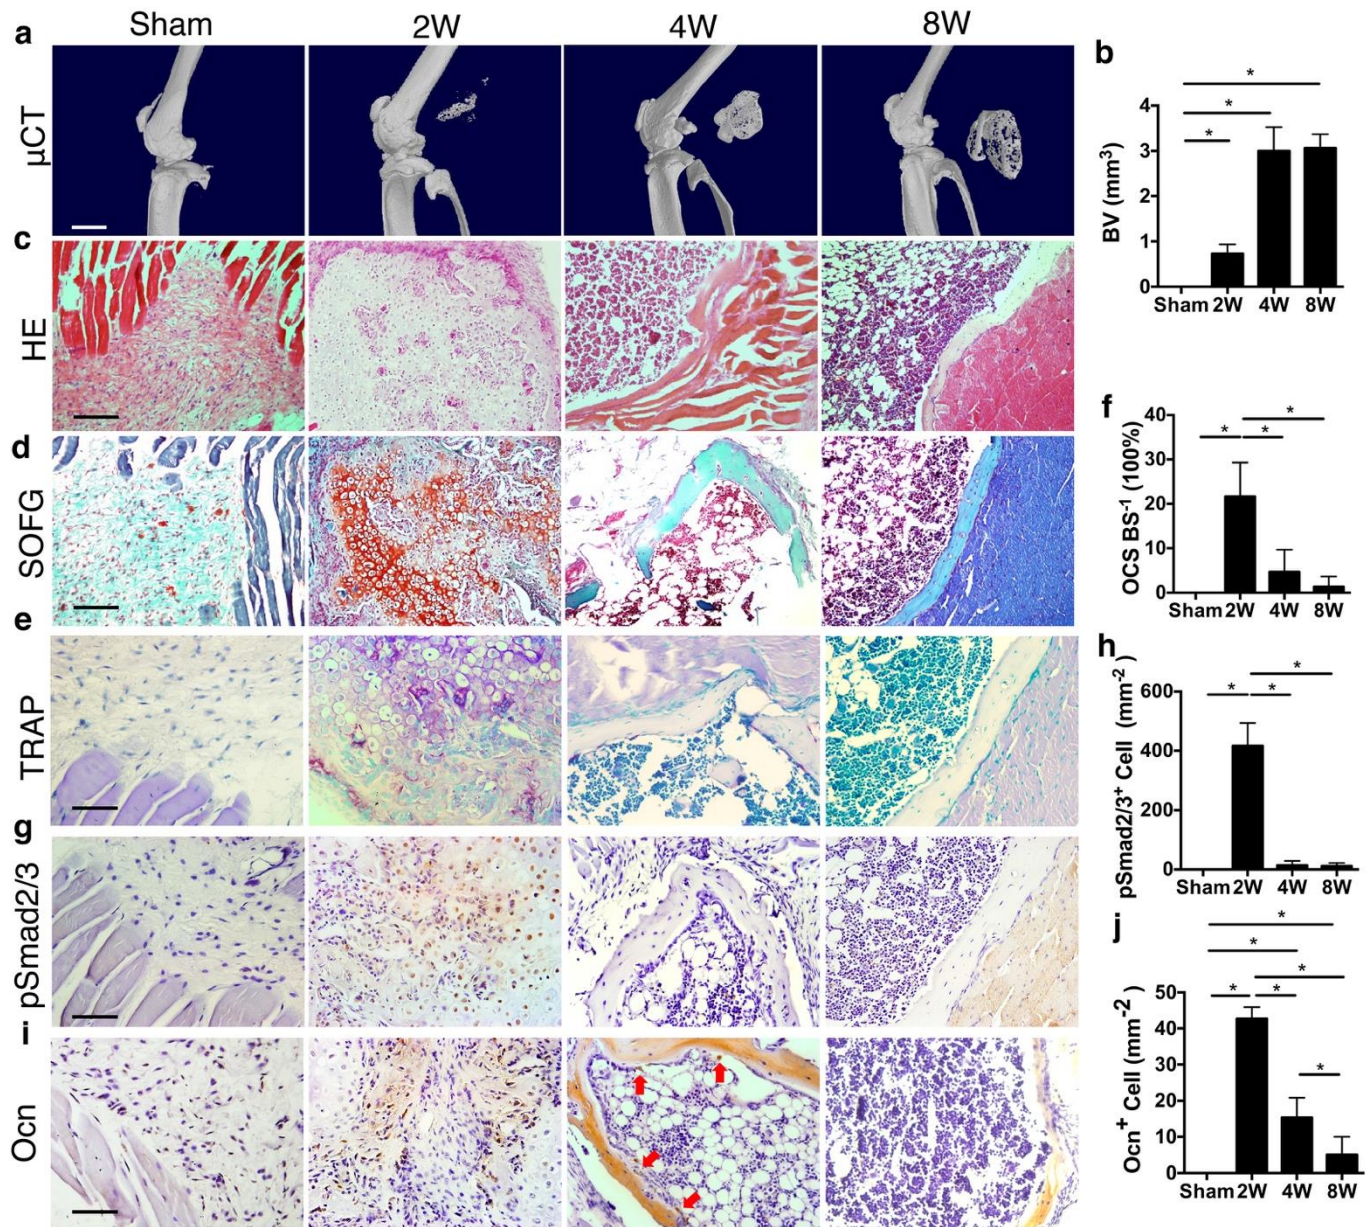

**Supplementary Figure 4. TGF-β activity is increased during HO progression in BMP/Gelatin implantation.**

(a) Micro CT images of hind limbs after sham operation or at 2, 4 and 8 weeks after BGI in hamstring muscles and (b) quantitative analysis of bone volume. Scale bar, 4mm. (c) H&E staining and (d) SOFG staining of hamstring muscles. Scale bars, 100μm. (e) TRAP staining (magenta) and (f) quantification of ectopic bone in mouse hamstring muscles. Scale bar, 50μm. (g, i) Immunohistochemical staining and (h, j) quantification of (g, h) pSmad2/3<sup>+</sup> cells and (i, j) Ocn<sup>+</sup> cells after sham operation or BGI. Scale bars, 50μm. Red arrow shows Ocn<sup>+</sup> cells. All data are shown as the mean ± s.d. n = 8 per group. \*p < 0.05 determined by one way ANOVA.

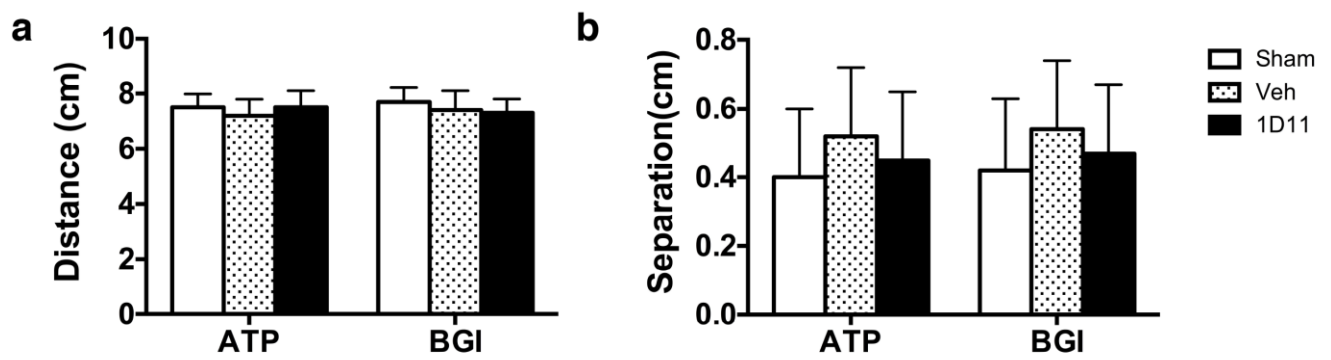

**Supplementary Figure 5. Quantitative analysis of the walking footprint patterns of sham operated, vehicle or antibody treated ATP or BGI operated mice.**

(a) The distance of stride length and (b) the distance between front and hind footprint were measured. All data are shown as the mean  $\pm$  s.d. n = 8 per group. Statistical analysis was performed by one way ANOVA.

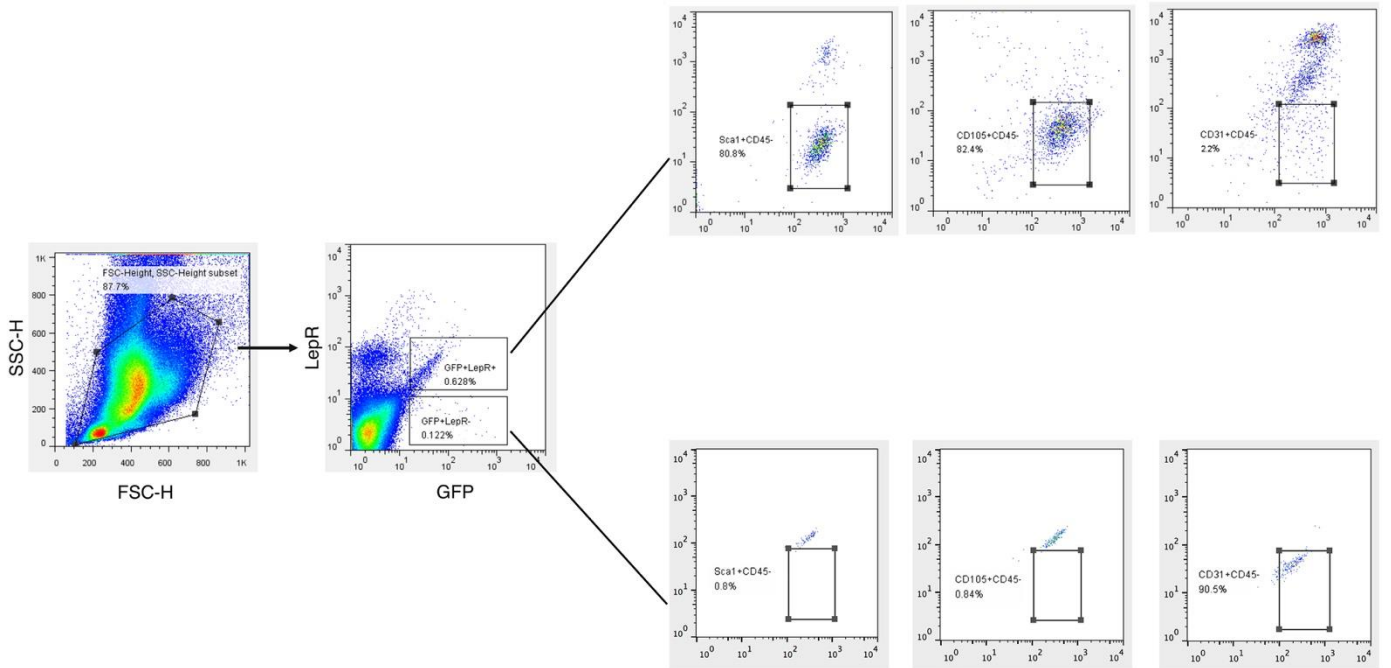

**Supplementary Figure 6. Representative FACS gating strategy for analyzing Nestin<sup>+</sup> cells.**

Viable single cells were first gated to select GFP<sup>+</sup>LepR<sup>+</sup> and GFP<sup>+</sup>LepR<sup>-</sup> cells, and then CD45<sup>-</sup>Sca1<sup>+</sup>, CD45<sup>-</sup>CD105<sup>+</sup> or CD45<sup>-</sup>CD31<sup>+</sup> cells.

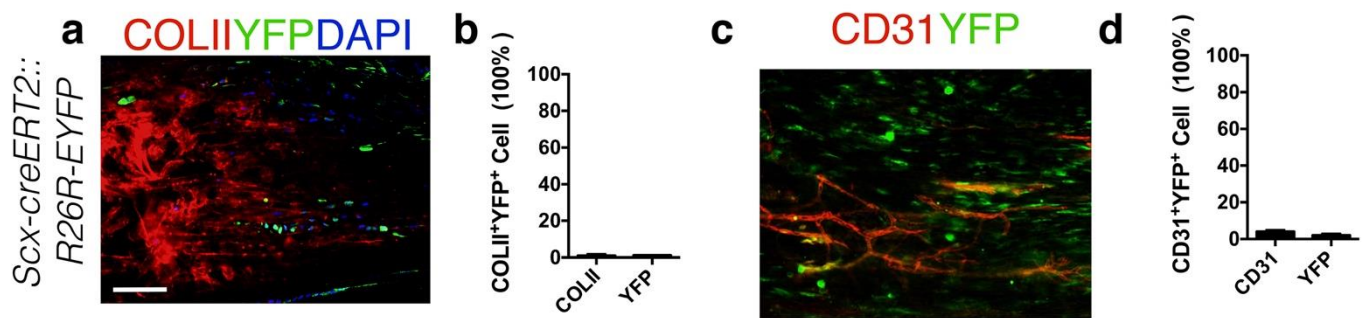

**Supplementary Figure 7. Tendon residing  $Scx^+$  cells do not provide precursors for HO formation.**

(a) Immunostaining of COLII<sup>+</sup> cells (red) and YFP<sup>+</sup> cells (green) and (b) quantitation of *Scx-creERT2::R26R-EYFP* mice 3 weeks post ATP. Scale bar, 50 $\mu$ m, n = 8 per group. (c) CD31<sup>+</sup> cells (red) and YFP<sup>+</sup> cells (green) and (d) quantitation in ectopic bone marrow of *Scx-creERT2::R26R-EYFP* mice 6 weeks post ATP. Scale bar, 50 $\mu$ m, n = 8 per group. All data are shown as the mean  $\pm$  s.d. n = 8 per group. Statistical analysis was performed by two tailed, unpaired student's *t* test.

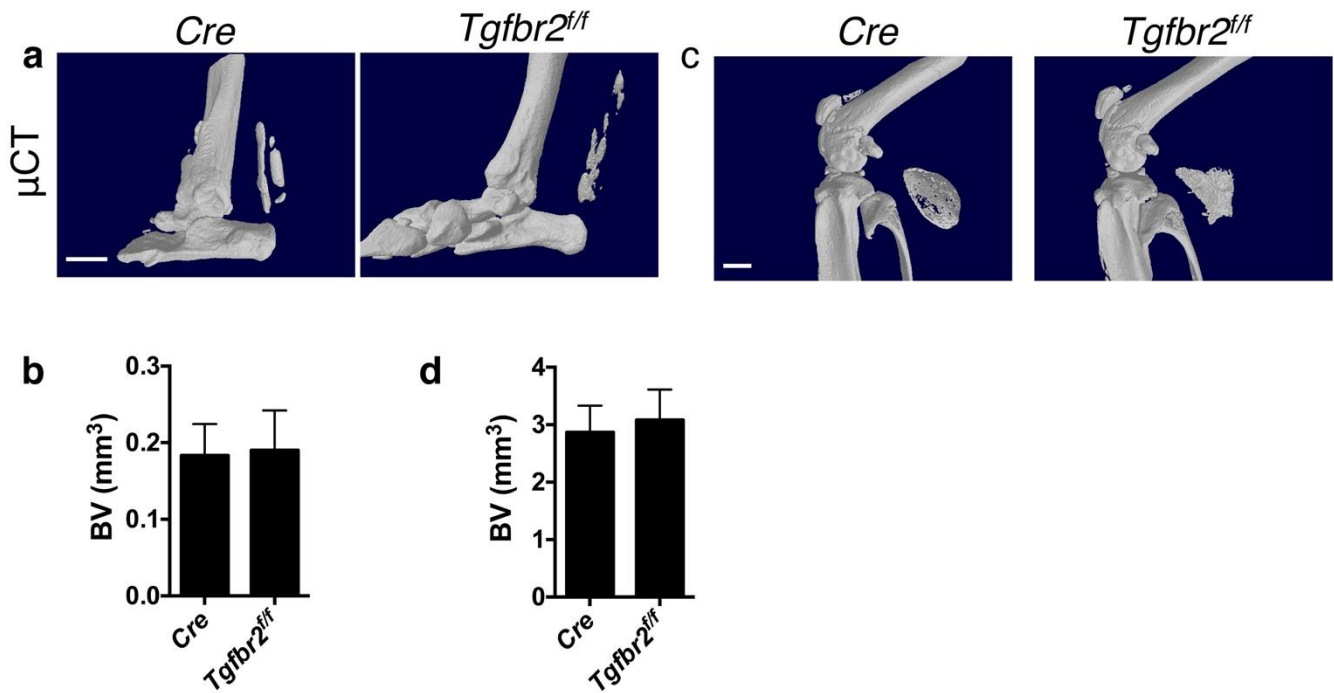

**Supplementary Figure 8.** No significant differences between tamoxifen treated *Nestin-creERT2* mice (*Cre*) mice and vehicle treated *Nestin-creERT2::Tgfbr2<sup>ff</sup>* (*Tgfbr2<sup>ff</sup>*) mice.

(a, c) Micro CT images and (b, d) quantifications of (a, b) Achilles tendons or (c, d) hamstring muscles of tamoxifen treated *Nestin-creERT2* mice (*Cre*) mice and vehicle treated *Nestin-creERT2::Tgfbr2<sup>lox/lox</sup>* (*Tgfbr2<sup>ff</sup>*) mice for 2 months after undergoing ATP or BGI surgery, respectively. Scale bars, 2mm. All data are shown as the mean  $\pm$  s.d. n = 8 per group. Statistical analysis was performed by two tailed, unpaired student's *t* test.
